# Supplementary material for: Single-step catalytic conversion of furfural to 2-pentanol over bimetallic Co–Cu catalysts
Source: Royal Society of Chemistry journal article supplement (doi:10.1039/c8re00195b), 2018-10-10
Supplement: c8re00195b1.pdf [file c8re00195b1.pdf]

## Single-step catalytic conversion of furfural to 2-pentanol over bimetallic Co-Cu catalysts

Bhogeswararao Seemala,<sup>†,‡,#</sup> Rajeev Kumar,<sup>†</sup> Charles E Wyman,<sup>†,‡</sup> Charles M. Cai,<sup>†,‡</sup> and Phillip Christopher,<sup>‡,#,\*</sup>

<sup>†</sup>Bourns College of Engineering - Center for Environmental and Research Technology (CE-CERT), University of California, Riverside, California 92507, USA.

<sup>‡</sup>Department of Chemical and Environmental Engineering, Bourns College of Engineering, University of California, Riverside, California 92521, USA.

<sup>#</sup> Department of Chemical Engineering, University of California, Santa Barbara, Santa Barbara, CA 93106, USA.

\*Corresponding Author Email: [pchristopher@ucsb.edu](mailto:pchristopher@ucsb.edu)

---

### Materials and Methods

#### *Catalysts Synthesis*

- (a) Synthesis of monometallic Cu, Ni and Co on Al<sub>2</sub>O<sub>3</sub> catalyst
- (b) Bimetallic Cu-Ni, Cu-Co and Co-Ni catalysts synthesis

#### *Reactivity measurements and product analysis*

#### *Catalyst Characterizations*

**Table S1:** Temperature effect on FF conversions over monometallic Cu, Ni and bimetallic Cu-Ni catalysts

### **Figures.**

**Figure S2.** FF conversions and products yield on monometallic Co on Al<sub>2</sub>O<sub>3</sub> catalyst as a function of time.

**Figure S3.** FF conversion and products yield over Cu-Co/Al<sub>2</sub>O<sub>3</sub> catalysts as function of H<sub>2</sub> pressure.

**Figure S4.** FF conversion and products yield over Cu-Co/Al<sub>2</sub>O<sub>3</sub> catalysts as function of reaction temperature.

**Figure S5.** Effect of catalyst reduction temperature over FF conversion and products yield.

## Materials and Methods

### *Catalysts synthesis*

(a) In a typical synthesis, the required amounts of copper (II) nitrate trihydrate ( $\text{Cu}(\text{NO}_3)_2 \cdot 3\text{H}_2\text{O}$ , purity 99%, CAS: 10031-43-3, Aldrich, New Jersey, USA) was dissolved in 50 mL deionized (DI)-water and added to 5 g of  $\theta\text{-Al}_2\text{O}_3$  contained in a round bottom flask to obtain a 5 wt% loading of Cu. The solution was mixed thoroughly, and dried at 80 °C in a rotary evaporator. The resulting solids were dried at 100 °C for 12 hours in an oven and calcined at 450 °C for 5 hours in air. Supported Ni and Co catalysts on  $\text{Al}_2\text{O}_3$  catalysts were prepared in the similar manner by using  $\text{Ni}(\text{NO}_3)_2 \cdot 6\text{H}_2\text{O}$ , (Aldrich, purity 99.99%, Louis, MO 63103, USA) and  $\text{Co}(\text{NO}_3)_2 \cdot 6\text{H}_2\text{O}$ , (Acros Organics, purity 99+%, Louis, MO 63103, USA), as precursors, respectively. Prior to reactivity experiments, all catalysts were reduced with pure  $\text{H}_2$  gas (flow rate of 50 mL min<sup>-1</sup>) at 450 °C for 3 hours and cooled to 25 °C under the same environment.

(b) To synthesize bimetallic Cu(5%)-Ni(5%) (or) Co(5%)-Cu(5%) (or) Co(5%)-Ni(5%) supported catalysts, required amounts of corresponding precursors (details mentioned above) were simultaneously added to 50 mL DI-water. This solution was added to 5 g of  $\theta\text{-Al}_2\text{O}_3$  in a round bottom flask, thoroughly mixed and then dried at 80 °C using rotary evaporator. The obtained material was dried in a vacuum oven at 100 °C for 12 hours followed by calcination at 450 °C for 5 hours. Prior to reactivity studies, catalysts were reduced by pure  $\text{H}_2$  (flow rate of 50 mL min<sup>-1</sup>) at 150°C, 300°C and 450 °C for 3 hours and cooled to 25 °C under the same environment.

### *Reactivity measurements*

0.3 g of reduced catalyst was transferred into a 100 mL stainless-steel Parr micro bench-top reactor (4590 Series, Parr instruments Co., Moline, IL) containing 1 g of FF (or) MF (99.9% pure, Sigma Aldrich) with 25 ml of 1,4-dioxane (HPLC Grade, Fisher Chemicals) as a solvent.

The reactor was initially flushed with H<sub>2</sub> and then pressurized with H<sub>2</sub> gas. Then, the reactor temperature was raised to desirable (180 °C to 240 °C) and reactions were conducted for 0.5-12 hours. After the reaction, liquid samples were separated by vacuum filtration, and analyzed by gas chromatography.

Liquid products were analyzed on an Agilent gas chromatograph (7890A, Agilent Technologies). A DB-WAX Ultra Inert column (Agilent Technologies) that was 30 m long x 0.320 mm internal diameter x 0.5 micron was used to quantify FF, FOL, THFOL, MF, furan, and 2-POL using a flame ionization detector (FID) using the following program: hold for 1 min at 30 °C, increase from 30 to 100 °C at a ramp rate of 10 °C min<sup>-1</sup>, hold for 2 min at 100 °C, increase from 100 to 250 °C at a ramp rate of 10 °C min<sup>-1</sup>. MF and MTHF yields were further quantified by using Hp-5 column that was 30 m long × 0.320 mm internal diameter × 0.25 micron via FID using the following program: 1 min hold at 30 °C, increase from 30–100 °C at a ramp rate of 10 °C/min, 2 min hold, increase from 100–325 °C at a ramp rate of 25 °C/min and hold for 1 min. Final product in molar yields were quantified by using calibration curves of standard samples in the gas chromatograph. Reactant conversion and product yield were calculated as follows:

$$FF \text{ conversion, \%} = \left( 1 - \frac{\text{Moles of unreacted FF}}{\text{Moles of FF before reaction}} \right) \times 100 \quad \text{-----> (1)}$$

$$\text{Yields (mol \%)} = \frac{\text{Moles of the product formed}}{\text{Initial mole of FF}} \times 100 \quad \text{-----> (2)}$$

### *Catalyst Characterizations*

XRD spectra of reduced catalysts were recorded in the  $2\theta$  range of 20 to  $90^\circ$  using an X'pert Pro PANalytical diffractometer equipped with a Nickel filtered Cu  $K\alpha$  radiation source.

$H_2$ -TPR experiments were carried out on a Micromeritics AutoChem 2920 instrument. In each experiment, 0.05 g of catalyst was placed in a quartz tube, and treated with  $O_2$  gas (50 mL  $\text{min}^{-1}$  flow rate) followed by raising the temperature to  $350^\circ\text{C}$  by  $10^\circ\text{C}/\text{min}$  ramp rate. Reactor was held at  $350^\circ\text{C}$  for 1 hour and then cooled it to  $35^\circ\text{C}$ . A gas mixture of  $H_2$  (10%)–Ar (90%) was passed through the quartz reactor at same temperature for 1 h with a 50 mL  $\text{min}^{-1}$  flow rate. The temperature was raised to  $700^\circ\text{C}$  at a linear heating rate of  $5^\circ\text{C min}^{-1}$ . A standard CuO powder was used to calibrate  $H_2$  consumption.

**Table S1:** Temperature effect on FF conversions over monometallic Cu, Ni and bimetallic Cu-Ni catalysts

| Al <sub>2</sub> O <sub>3</sub><br>support<br>catalyst | At 200 °C, 25 bar H <sub>2</sub> pressure |                   |      |       | At 240 °C, 35 bar H <sub>2</sub> pressure |      |      |       |
|-------------------------------------------------------|-------------------------------------------|-------------------|------|-------|-------------------------------------------|------|------|-------|
|                                                       | Product yields (mol %)                    |                   |      |       | Product yields (mol %)                    |      |      |       |
|                                                       | THFOL/FOL                                 | MF                | MTHF | 2-POL | THFOL                                     | MF   | MTHF | 2-POL |
| Cu                                                    | 0.0/18.2 <sup>a</sup>                     | 74.9 <sup>a</sup> | 0.0  | 0.0   | 0.0                                       | 92.5 | 0.0  | 0.0   |
| Ni                                                    | 54.5/0.0                                  | 2.5               | 30.5 | 0.0   | 13.1                                      | 0.0  | 63.0 | 2.1   |
| Co                                                    | 0.0/0.0                                   | 50.3              | 5.0  | 26.1  | 0.0                                       | 15   | 23.1 | 45.5  |

*Reaction conditions:* Reactions were run at a FF loading of 1 g, catalyst loading of 0.3 g, 25 mL of 1,4 Dioxane as solvent after 2 hours reaction time. <sup>a</sup>8 hours reaction. FF conversions were 100% in all the above cases.

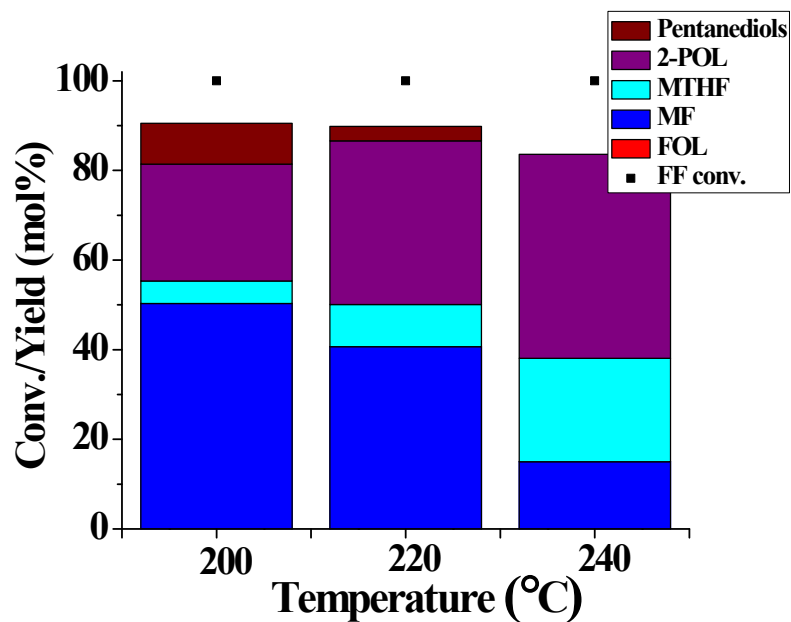

**Figure S2.** FF conversions and products yield on monometallic Co (5%) on Al<sub>2</sub>O<sub>3</sub> catalysts. All reactions were run with a FF loading of 1 g, a catalyst loading of 0.3 g, 25 mL of 1,4-dioxane as a solvent, and an H<sub>2</sub> pressure of 35 bar.

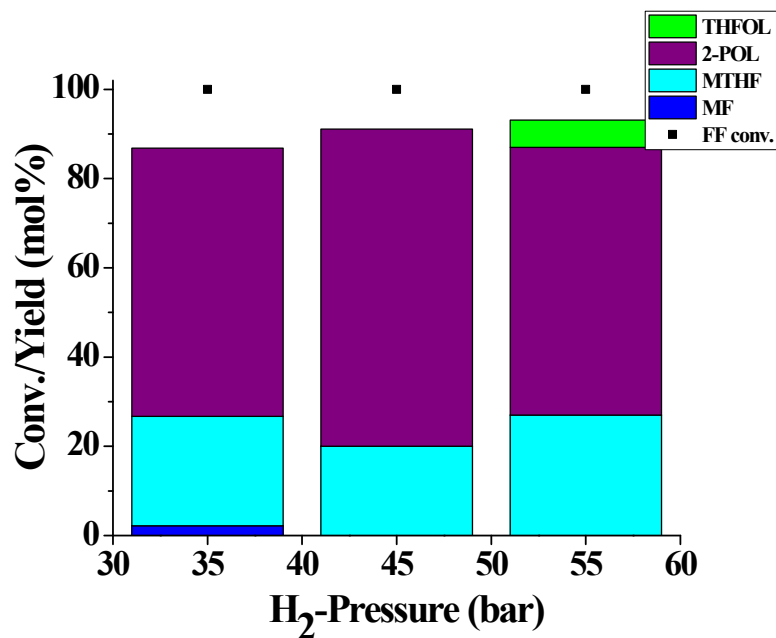

**Figure S3.** FF conversion and products yield over Cu-Co/Al<sub>2</sub>O<sub>3</sub> catalysts as function of H<sub>2</sub> pressure. Reaction conditions were a FF loading of 1 g, catalyst loading of 0.3 g, 25 mL of 1,4-dioxane as a solvent, a temperature of 240 °C, and 12 h run time.

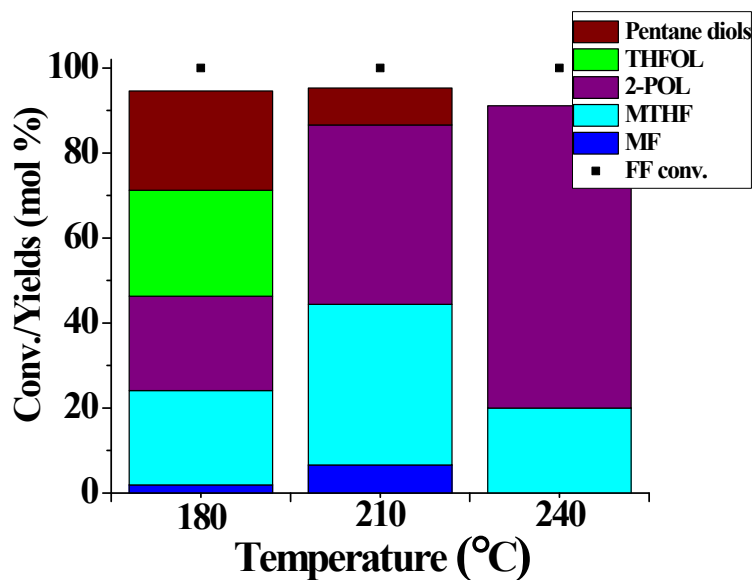

**Figure S4.** FF conversion and products yield over Cu-Co/Al<sub>2</sub>O<sub>3</sub> catalysts as function of reaction temperature. Reaction conditions were a FF loading of 1 g, catalyst loading of 0.3 g, 25 mL of 1,4-dioxane as a solvent, H<sub>2</sub> pressure of 45 bar, and 12 h run time.

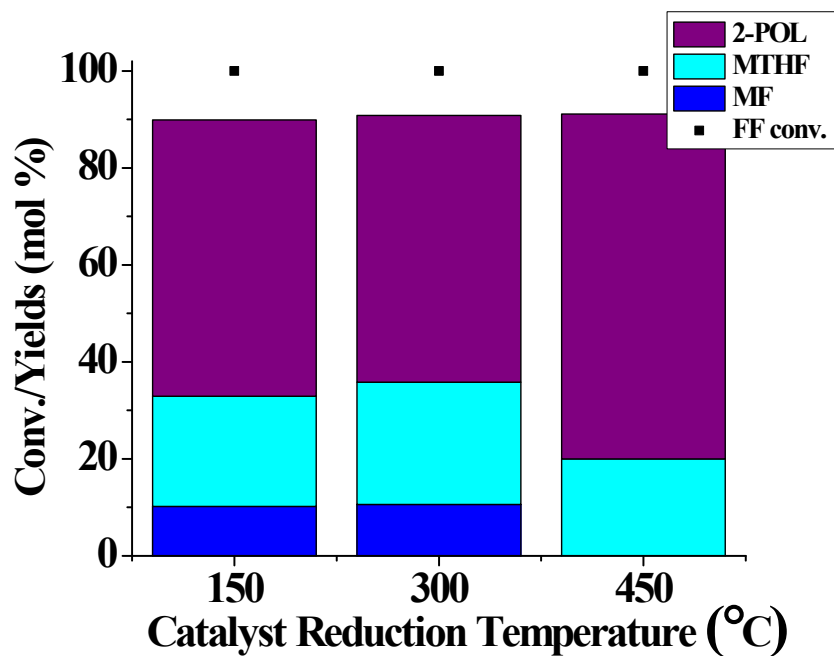

**Figure S5.** Effect of catalyst reduction temperature over FF conversion and products yield. Reaction conditions were a FF loading of 1 g, catalyst loading of 0.3 g, 25 mL of 1,4-dioxane as a solvent, reaction temperature of 240 °C, H<sub>2</sub> pressure of 45 bar, and 12 h run time
